# Supplementary material for: A traditional gynecological medicine inhibits ovarian cancer progression and eliminates cancer stem cells via the LRPPRC–OXPHOS axis
Source: J Transl Med. 2023 Jul 26;21:504. doi: 10.1186/s12967-023-04349-3 (PMC10373366; doi:10.1186/s12967-023-04349-3)
Supplement: Supplementary file 2 — Additional file 2. Data 1. Inhibition rate of natural compounds on ovarian cancer cells. [file 12967_2023_4349_MOESM2_ESM.xlsx]

## Sheet: Cell Inhibition Ratio
CAS NO Molecules	A2780 Inhibition Ratio(%)	PDC Inhibition Ratio(%)
13103-34-9 Boldenone Undecylenate	5.81692	6.22149
138-86-3 Cinene	21.3057	-7.01987
64-04-0 Phenethylamine	12.2602	-9.43571
58-08-2 Caffeine	16.5864	0.300075
138-52-3 Salicoside	15.5172	-6.59068
590-46-5 Betaine hydrochloride	18.8777	-7.89256
57-64-7 Physostigmine Salicylate	31.4545	-4.42013
71-63-6 Digitoxin	86.5926	79.6513
539-86-6 Allicin	-1.8978	3.12327
16816-67-4 D-Pantethine	16.7067	-1.67933
76-49-3 Bornyl acetate	11.3968	-2.25765
58-63-9 Inosine	13.2394	1.23731
88495-63-0 Artesunate	75.3349	13.2794
107-35-7 Taurine	5.99338	-10.7659
1492-18-8 Calcium folinate	12.0723	-2.91659
64-86-8 Colchicine	87.7117	46.3717
2385-63-9 Liensinine Perchlorate	22.91	13.3357
24851-98-7 Methyl Dihydrojasmonate;Hedione	14.5151	-7.94705
81-13-0 Dexpanthenol	12.0591	-7.26315
81-23-2 Dehydrocholic acid	9.99927	-7.81911
69-65-8 D-Mannitol	11.831	1.13964
3810-74-0 Streptomycin sulfate	14.5739	-6.53362
148408-66-6 Docetaxel trihydrate	82.904	58.7047
6899-04-3 DL-Glutamine	12.5387	7.53766
313-67-7 Aristolochic Acid	9.17231	70.4257
4180-23-8 Trans-Anethole	19.4404	-3.20275
83-86-3 Phytic acid	16.5108	4.3206
985-13-7 Ethaverine hydrochloride	58.4534	22.841
476-66-4 Ellagic acid	12.2835	-8.69866
66-22-8 Uracil	12.3355	-3.0918
1077-28-7 Thioctic acid	10.908	0.777645
50-70-4 D-Sorbitol	9.22138	6.65806
72962-43-7 Brassinolide	4.77497	-14.6959
470-82-6 Eucalyptol	17.8971	-8.53116
84-80-0 Vitamin K1	15.9175	-4.55341
58-27-5 Menadione	84.1536	26.1511
51-55-8 Atropine	14.7721	4.22294
59-30-3 Folic acid	6.31625	-1.05259
11013-97-1 Methyl hesperidin	6.47448	9.82931
770-05-8 Octopamine hydrochloride	11.733	8.70613
77-54-3 Cedryl acetate	5.93858	5.47301
486-56-6 (-)-Cotinine	15.1718	-2.06588
90-05-1 Guaiacol	12.4567	0.712153
73-22-3 L-Tryptophan	12.2011	7.42365
527-07-1 Sodium gluconate	11.0733	-3.09636
73-32-5 isoleucine	7.68129	-1.8221
17692-71-6 Vanitiolide	5.40069	1.12141
497-76-7 Arbutin	-10.2383	13.8551
104-46-1 cis-Anethol	0.808165	-10.0434
541-91-3 Muscone	21.5712	5.36526
97-53-0 Eugenol	9.2988	4.09604
3416-24-8 Glucosamine	8.68549	4.20521
118-10-5 Cinchonine	10.4673	-0.983035
73-24-5 Adenine	2.28669	-2.94324
129-16-8 Merbromin	-35.2539	-3.90158
136572-09-3 Irinotecan hydrochloride trihydrate	75.4861	41.6653
1125-21-9 Ketoisophorone	7.91765	4.87524
58-95-7 Vitamin E Acetate	11.279	8.30594
302-27-2 Aconitine	13.6587	6.20979
57-85-2 Testosterone propionate	20.633	8.74172
471-53-4 Enoxolone	11.7985	-1.0978
60-41-3 Strychnine Sulfate	15.6829	11.0177
6151-40-2 Quinidine hydrochloride	1.7976	5.09375
57-83-0 Progesterone	34.2204	23.4518
119-36-8 Methyl salicylate	10.7924	4.69489
59-02-9 Vitamin E	10.216	3.66011
357-57-3 Brucin	19.889	3.34311
87-89-8 Inositol	11.1016	3.6508
50-04-4 Cortisone acetate	12.0049	3.66387
127294-70-6 Balofloxacin	9.40259	0.529574
79-61-8 Dichlorisone Acetate	9.73633	4.4073
485-35-8 Cytisine	1.31647	17.8208
127-47-9 Retinyl acetate	-16.1134	14.9104
622-78-6 Benzyl isothiocyanate	37.0406	-6.94402
57-24-9 Strychnine	11.5658	-13.2775
633-65-8 Berberine hydrochloride	34.2303	-4.17219
25990-60-7 DL-Xylose	-0.841854	-8.93644
5578-73-4 Sanguinarine chloride	90.8557	89.8943
6805-41-0 Escin	6.75162	-3.15844
60-27-5 Creatinine	-14.8051	5.37064
56-12-2 4-Aminobutyric acid	-9.54045	0.230526
608-66-2 Dulcitol	7.15297	8.78542
4046-02-0 Ethyl ferulate	-10.8103	9.32014
87-72-9 L(+)-Arabinose	4.10505	-0.373764
6533-68-2 Scopolamine HBr trihydrate	4.90561	5.67589
81-27-6 Sennoside A	-3.96185	-10.9147
53-16-7 Aquacrine	8.07272	8.58614
1397-89-3 Amphotericin B	-8.49605	6.09191
531-75-9 Esculin	-0.455706	6.69074
487-26-3 Flavanone	9.0069	4.98676
140-10-3 Cinnamic acid	9.11769	11.0087
28697-53-2 D(-)-Arabinose	3.44809	4.31197
1135-24-6 Ferulic Acid	8.44118	8.28073
62013-04-1 Dirithromycin	1.86143	7.47029
114-07-8 Erythromycin	3.14706	4.2243
51-43-4 L-Adrenaline	-2.3332	11.3734
482-89-3 Indigo	3.61045	19.1548
1135-23-5 Hydroferulic acid	-0.791102	26.645
1405-86-3 Glycyrrhizin (Glycyrrhizic Acid)	0.558313	4.31201
87-99-0 Xylitol	8.8839	1.36625
57-10-3 Palmitic acid	12.4769	0.929843
117704-25-3 Doramectin	6.82321	-3.95788
22373-78-0 Monensin sodium salt	78.8214	-10.5282
1405-20-5 Polymyxin B sulfate	81.192	46.8203
76-22-2 Camphor	-12.2369	3.81926
99-50-3 Protocatechuic acid	4.08313	6.62688
89-78-1 DL-Menthol	-0.0199852	-3.84057
6381-77-7 Sodium erythorbate	4.97968	-16.7548
110-15-6 Succinic acid	7.82956	-3.57883
65-23-6 Pyridoxine	2.72677	-6.15134
114977-28-5 Docetaxel	78.9762	63.7328
58-55-9 Theophylline	0.990257	7.80404
99-96-7 4-Hydroxybenzoic acid	-8.56251	7.48804
93-40-3 Homoveratrumic acid	-9.83482	13.6886
539-15-1 Hordenine	-5.76158	10.0659
23180-57-6 Paeoniflorin	-9.155	0.254322
59-23-4 Alpha-D-galactose	-0.585685	1.01611
65-19-0 Yohimbine hydrochloride	-1.45415	7.47074
520-26-3 Hesperidin	-7.93546	6.4669
65710-07-8 Apramycin sulfate	3.88069	-1.16959
3943-74-6 Methyl Vanillate	-0.832106	16.8543
1916-07-0 Methyl EudesMate	-0.825492	5.81382
501-94-0 Tyrosol	-3.63799	3.6928
477-90-7 Bengenin	-7.82933	4.15587
530-26-7 Mannose	12.2152	4.4683
434-03-7 Ethisterone	2.43753	2.42878
68-19-9 Cyanocobalamin	-2.19847	1.56135
70-18-8 Glutathione	5.75268	9.47468
617-05-0 Ethyl Vanillate	-15.0177	9.03737
529-44-2 Myricetin	19.4223	8.71014
530-57-4 Syringic acid	-12.4255	5.83886
50-22-6 Corticosterone	-1.67841	0.986009
552-41-0 Paeonol	-4.30493	4.31234
912-60-7 Noscapine hydrochloride	5.00077	7.78775
51-42-3 Epinephrine bitartrate	2.56762	20.2076
50-14-6 Vitamin D2	3.26816	16.1109
498-00-0 Vanillyl Alcohol	1.09982	11.9812
23696-28-8 Olaquindox	8.57403	3.70941
149-32-6 Erythritol	1.80466	8.05618
66170-10-3 Sodium L-ascorbyl-2-phosphate	-2.16623	5.86506
6155-35-7 L-Rhamnose monohydrate	2.37198	0.829529
52-67-5 Artamine	-2.5829	12.5621
50-28-2 Estradiol	6.72619	8.37956
1263-89-4 Paromomycin Sulfate	3.80283	12.6637
881-68-5 Acetylvanillin	-3.41473	5.85494
62-46-4 Alphalipoic acid	1.45333	6.89614
69-79-4 Maltose	1.34932	3.17651
65-46-3 Cytidine	8.11972	2.91366
486-66-8 Daidzein	1.00075	4.87953
957-68-6 7-Aminocephalosporanic acid	-21.9706	-0.129236
302-79-4 Tretinoin	-14.9072	13.5054
58-85-5 D-Biotin	0.78642	13.5125
72207-94-4 Ethyl vanillin acetate	-2.7841	7.68473
508-02-1 Oleanolic Acid	26.4726	8.81109
585-88-6 Maltitol	-6.44198	7.39571
53-43-0 Dehydroepiandrosterone	3.81897	12.1258
10236-47-2 Naringin	-6.9294	23.1336
1401-69-0 Tylosin	-5.31366	-4.98551
404-86-4 Capsaicin	21.8405	8.95477
518-28-5 Podophyllotoxin	88.2563	55.2096
1405-97-6 Gramicidin	91.6841	83.0739
130-40-5 Flavin mononucleotide	1.52541	-9.28434
75330-75-5 Lovastatin	60.9423	-25.1014
537-73-5 Isoferulic acid	3.26404	-5.66224
138-59-0 Shikimic Acid	-0.738851	-10.1292
577-85-5 3-Hydroxyflavone	-7.79989	-14.3369
7689-03-4 (+)-Camptothecin	86.3057	82.1342
66-84-2 Glucosamine hydrochloride	4.38297	2.28246
345909-26-4 Taurocholic acid sodium salt hydrate	-2.15638	-7.16624
68-94-0 6-Hydroxypurine	-1.28516	-22.5979
148-72-1 Pilocarpine nitrate	2.17501	-21.7022
6559-91-7 4'-Demethylepipodophyllotoxin	78.2477	41.9659
2468-21-5 Catharanthine	-1.2763	-1.01178
11024-24-1 Digitonin	91.8276	91.9008
21593-77-1 S-allyl-L-cysteine	14.6639	1.71885
72-48-0 Alizarin	4.06858	10.6996
135729-62-3 Palonosetron hydrochloride	8.03177	-2.98477
2150-43-8 Methyl protocatechuate	-16.7481	-10.0613
66-81-9 Actidione	80.0336	62.9104
32854-75-4 Lappaconitine	7.92607	-21.6979
6080-33-7 Sinomenine hydrochloride	0.271891	-10.2922
564-20-5 Sclareolide	2.74718	-13.5652
83-79-4 Rotenone	82.8273	51.653
469-77-2 Spiculisporic Acid	6.13757	5.93171
6990-06-3 Fusidine	-0.435195	4.64579
61-25-6 Papaverine hydrochloride	38.9369	4.36141
1405-87-4 Bacitracin	4.11937	-19.2126
17912-87-7 Myricetrin	3.16931	-19.8877
77-95-2 Quinic acid	-3.99637	-2.23028
525-82-6 Flavone	5.41246	-20.954
475-31-0 Glycocholic acid	15.4937	-9.21129
3943-97-3 Methyl 4-hydroxycinnamate	-43.5641	13.6804
64-72-2 Chlortetracycline hydrochloride	26.2293	0.892285
97-59-6 Allantoin	5.48213	-7.35903
1264-72-8 Colistin sulfate	-4.57998	-10.0964
26904-64-3 Oxysophocarpine	2.24291	-7.96076
501-97-3 Phloretic acid	-0.470088	-5.18964
18835-59-1 3,5-Diiodotyrosine Dihydrate	13.0526	-11.9787
13110-96-8 5-Acetylsalicylic acid	13.9912	-12.713
480-66-0 Phloracetophenone	10.9102	6.91741
485-71-2 Cinchonidine	-13.5043	-6.45753
481-29-8 Epiandrosterone	9.32372	-8.02727
32986-56-4 Tobramycin	6.0314	-7.69758
115-53-7 Sinomenine	6.35935	-4.82054
19685-09-7 10-Hydroxycamptothecin	86.5534	76.7174
77-06-5 Gibberellic acid	2.05685	-19.8532
1448-36-8 Methyl Cholate	12.9205	-7.82613
80-97-7 Dihydrocholesterol	8.84571	11.8844
11018-89-6 Ouabain octahydrate	87.6729	68.5935
434-13-9 Lithocholic acid	6.16376	-15.4073
2068-78-2 Vincristine sulfate	88.1105	45.5133
10094-58-3 D-Stachyose tetrahydrate	1.85106	-13.0769
491-80-5 Biochanin A	15.2406	-4.52172
34369-07-8 Adenosine disodium triphosphate	7.47439	-10.571
1139-30-6 Caryophyllene oxide	10.5525	-11.7947
490-79-9 Gentisic acid	9.34215	9.70142
2444-46-4 Nonivamide	-4.0011	-3.24866
652-37-9 Theophylline-7-acetic acid	-1.28661	-7.27126
13739-02-1 Diacerein	4.45533	0.785676
20702-77-6 Neohesperidin Dihydrochalcone (Nhdc)	9.23149	-7.73695
487-06-9 Citropten	10.9089	-15.6389
300-08-3 Arecoline HBr	-1.93108	-15.9541
7585-39-9 Beta-Cyclodextrin	1.23572	-7.48788
512-04-9 Diosgenin	11.8263	10.2454
71963-77-4 Artemether	-24.7797	-8.04929
119413-54-6 Topotecan hydrochloride	81.8017	76.775
2182-14-1 Vindoline	-1.15505	-4.70523
18916-17-1 Naringin dihydrochalcone	-1.10262	-10.0247
566-88-1 5alpha-Cholestan-3-one	3.25486	-7.88734
2934-97-6 Tetrahydropalmatine	5.43152	-8.49718
83-44-3 Deoxycholic acid	4.15348	-2.08764
86-51-1 o-Veratraldehyde	1.29948	6.26162
1435-55-8 Hydroquinidine	-50.3399	-5.46877
20830-75-5 Digoxin	85.3822	65.9787
568-73-0 Tanshinone I	86.1237	7.19656
65914-17-2 Piceid	-5.28711	-8.59455
16373-93-6 2'-Deoxyadenosine monohydrate	4.4057	-4.4019
27548-93-2 Baccatin III	41.3821	13.1405
526-99-8 Mucic Acid	5.03556	-0.749621
87-79-6 L(-)-sorbose	25.2524	14.5096
57-87-4 Ergosterol	4.38562	3.83247
2524-37-0 Orsellinic acid ethyl ester	0.0873014	-18.7176
1552-94-9 5-Phenyl-2,4-pentadienoic acid	5.02045	-5.67764
27741-01-1 Geniposidic Acid	0.207489	-11.1944
118-41-2 Gallic acid trimethyl ether	-2.51272	-6.36415
79902-63-9 Simvastatin	58.8898	-14.6843
70-26-8 L-Ornithine	-9.97279	-5.73631
382-45-6 Adrenosterone	2.88477	12.8549
90-47-1 Xanthone	5.37784	-3.85218
6665-83-4 6-Hydroxyflavone	-5.23174	-20.0053
71-44-3 Spermine	-6.03286	-15.1233
139-85-5 Protocatechualdehyde	16.4477	-20.9015
69-93-2 Uric Acid	-0.257034	-22.378
130-95-0 Quinine	-17.2908	-4.41777
57-13-6 Urea	-1.56177	-6.30118
153-98-0 Serotonin hydrochloride	7.35683	1.9625
83-72-7 Lawsone	11.5674	9.91122
2079-89-2 3-Aminopropionitrile fumarate	-3.43468	-11.2815
504-88-1 Bovinocidin	1.17383	-24.4391
521-61-9 Rheochrysidin	-0.430048	-24.977
83-67-0 Theobromine	-0.586228	-31.4251
73573-88-3 Mevastatin	65.8276	-36.0673
149-91-7 Gallic acid	-1.61574	-3.89681
481-49-2 Cepharanthine	89.2736	36.9804
528-50-7 D-Cellobiose	-0.52328	-9.81085
533-87-9 Aleuritic Acid	-2.20956	-12.4601
59-00-7 Xanthurenic Acid	6.49724	-21.7255
515-03-7 Sclareol	2.7502	-9.23127
520-33-2 Hesperetin	1.85271	-17.6307
91-64-5 Coumarin	1.75993	-4.33215
520-27-4 Diosmin	10.3671	0.45091
24512-63-8 Geniposide	8.12722	2.34578
304-21-2 Harmaline	7.08418	-1.28942
90-24-4 Xanthoxyline	-7.76832	-11.1874
343-65-7 Kynurenine	1.5796	-7.19214
465-99-6 Hederagenin	-1.46314	-13.3124
77-52-1 Ursolic acid	-0.0363789	-10.1046
7085-55-4 Troxerutin	-1.04074	-4.79464
59-67-6 Nicotinic acid	7.42939	-9.64489
4350-09-8 L-5-Hydroxytryptophan	10.1859	1.00197
152-58-9 Cortodoxone	4.31354	-11.5742
4460-86-0 Asarylaldehyde	0.882604	-15.0753
4773-96-0 Mangiferin	8.78657	-6.79223
19368-18-4 Ftaxilide	0.849353	-13.0471
491-70-3 Luteolin	-2.40879	-11.1793
8024-48-4 Casanthranol	-0.190544	-1.33849
464-49-3 D-Camphor	2.92656	2.18922
58-56-0 Pyridoxine hydrochloride	4.63564	14.1711
585-99-9 Melibiose	-1.08231	-9.50067
2555-28-4 7-Methoxy-4-methylcoumarin	2.19365	-8.88327
4168-17-6 Catharanthine tartrate	7.54502	-0.0387113
42971-09-5 Vinpocetine	-0.463955	-9.59421
485-72-3 Formononetin	11.3602	-8.39936
57-88-5 Cholesterol	11.3129	5.92215
3687-18-1 Homotaurine	10.4675	-6.20423
544-62-7 Batyl alcohol	13.9069	11.2938
627-77-0 Citrulline	5.97575	-7.91705
480-64-8 Orsellinic acid	-0.471883	-3.66636
14375-45-2 Abscisic acid	-1.64787	-7.46841
61-54-1 Tryptamine	4.10312	-9.84823
961-29-5 Isoliquiritigenin	-45.9219	-11.0791
65-86-1 Orotic acid	5.82591	-5.71687
661-19-8 Behenic alcohol	5.88856	-0.340923
305-01-1 Esculetin	4.6054	7.95043
53-06-5 Cortisone	1.95698	-12.3353
81-25-4 Cholic Acid	3.14531	-16.4443
207511-10-2 Melezitose	9.22159	-21.3724
71939-50-9 Dihydroartemisinin	71.1065	9.61543
484-20-8 Bergapten	11.6128	-13.7533
461-06-3 DL-Carnitine	3.36149	-13.325
50-99-7 D(+)-Glucose	1.58998	-6.01392
60-82-2 Phloretin	4.26418	13.4823
125-46-2 Usnic Acid	-17.5744	0.96028
20426-12-4 4-Hydroxychalcone	-21.7279	-16.0852
10161-34-9 Trenbolone acetate	-36.5993	-14.0432
10083-24-6 Piceatannol	16.1922	-13.6658
128-13-2 Ursodeoxycholic acid	-4.01301	-11.4863
1098-97-1 Pyrithioxin	-4.82433	-11.6017
67-03-8 Thiamine hydrochloride	-5.99876	1.98644
1968-05-4 3,3'-Diindolylmethane	-6.17418	7.52407
27200-12-0 Dihydromyricetin	-2.05116	-1.00087
19309-14-9 Cardamoni	60.8835	30.2024
2188-68-3 Lycorine chloride	76.6293	66.977
67-47-0 5-Hydroxymethyl-2-furaldehyde	4.02388	-2.69263
60-81-1 Phlorizin	6.30229	7.37229
3681-99-0 Puerarin (Kakonein)	4.97598	-12.2021
64-75-5 Tetracycline hydrochloride	-0.968436	-10.285
66-76-2 Dicumarol	35.2626	-2.43566
478-43-3 Rheic Acid	-0.919896	-5.12473
518-34-3 Tetrandrine	89.3884	34.5416
480-41-1 Naringenin	-0.673142	-9.10857
5508-58-7 Andrographolide	25.1596	-18.0977
13241-33-3 Neohesperidin	0.642843	-29.4151
16837-52-8 Oxymatrine	0.486498	-19.4536
21736-83-4 Spectinomycin dihydrochloride	7.13926	6.90627
154-23-4 Cianidanol	8.03333	2.54477
35354-74-6 Honokiol	-30.4952	6.2355
56-69-9 5-hydroxytryptophan (5-HTP)	-2.38376	-12.5078
145572-44-7 Sophocarpine	2.90006	-16.4244
18449-41-7 Madecassic acid	5.03371	-21.0384
67920-52-9 Sodium Danshensu	6.27395	-26.7921
518-82-1 Emodin	23.7344	-13.9064
50-55-5 Reserpine	28.9299	4.22722
8025-81-8 Spiramycin	7.84191	-1.356
528-43-8 Magnolol	-24.3445	-1.20754
5442-12-6 Norcantharidin	0.0429792	6.21002
1449-05-4 Glycyrrhetinic acid(Enoxolone)	6.61594	-13.8905
484-12-8 Osthole	-3.45318	-6.84977
472-15-1 Betulinic acid	7.15026	-1.73708
491-67-8 Baicalein	40.9785	-3.95638
6160-12-9 (-)-Sparteine sulfate pentahydrate	7.6993	-2.7605
65-85-0 Benzoic acid	9.00963	4.38834
62499-27-8 Gastrodin	-0.966728	-10.1723
3081-61-6 L-Theanine	8.81909	-6.07944
9007-28-7 Chondroitine sulfate	3.39464	-11.7555
10338-51-9 Salidroside	4.97329	-7.59357
470-17-7 Isoalantolactone	38.8868	5.70716
519-02-8 (+)-Matrine	4.47515	1.71449
25389-94-0 Kanamycin sulfate	-0.185617	0.833048
120-47-8 Ethylparaben	10.2162	12.4665
94-62-2 Piperine	4.2253	4.31746
76494-51-4 Ligustrazine hydrochloride	10.4557	0.800032
21967-41-9 Baicalin	11.7415	-5.70743
84-26-4 Rutaecarpine	12.9271	18.3927
518-17-2 Evodiamine	70.0928	14.0743
537-42-8 Pterostilbene	0.49366	5.13336
153-18-4 Rutin	6.66697	-1.3993
58-22-0 Testosterone	9.737	18.5858
458-37-7 Curcumin	18.8726	-3.57758
10097-84-4 Rotundine, TETRAHYDROPALMATINE HYDROCHLORIDE	13.1338	-6.48077
607-80-7 Sesamin	6.38697	-14.5563
464-92-6 Asiatic acid	9.23708	-12.1969
82373-94-2 Astragalus polyphenols	-2.99962	-11.5576
39012-20-9 Picroside II	13.6205	-11.362
4618-18-2 Lactulose	5.93753	-2.80939
541-15-1 L(-)-Carnitine	4.59985	9.2668
73-03-0 Cordycepin	10.3733	5.16282
528-48-3 Fisetin	-12.353	-5.55402
120-08-1 Scoparone	-1.49803	-12.1771
27740-01-8 Scutellarin	5.20216	-3.08833
568-72-9 Tanshinone IIA	87.8481	15.2266
225937-10-0 (+)-Catechin Hydrate	4.72116	6.18971
117-10-2 Antrapurol	22.5799	21.0271
474-25-9 Chenodeoxycholic acid	9.13126	11.3993
480-39-7 Pinocembrin	25.8846	5.31545
4852-22-6 Proanthocyanidins	5.2941	-2.07655
501-98-4 p-Coumaric acid	-0.167397	-6.5899
1180-71-8 Limonin	-1.69259	-8.23433
56-25-7 Cantharidin	88.9718	75.4449
10605-02-4 Palmatine chloride	-33.0032	-3.48529
1401-55-4 Glycerite	8.21955	-6.40635
59-92-7 Levodopa	8.32984	8.32228
481-74-3 Chrysophanic Acid	7.93633	1.04493
83-49-8 Hyodeoxycholic acid (HDCA)	4.79553	6.37348
6138-41-6 Trigonelline hydrochloride	-0.946199	-3.30255
331-39-5 Caffeic Acid	-5.7842	4.98025
482-44-0 Imperatorin	4.1466	7.55824
35825-57-1 Cryptotanshinone	45.0803	18.6158
54-71-7 (+)-Pilocarpine hydrochloride	1.67185	16.5628
145-13-1 Pregnenolone	21.4169	32.6479
58-61-7 Adenosine	3.93851	-5.26033
98-92-0 Nicotinamide	-3.16211	1.81205
90-33-5 4-Methylumbelliferone (4-MU)	13.6156	3.31228
520-34-3 Diosmetin	86.4671	73.2001
1415-73-2 Aloin	5.66657	-3.59424
58-96-8 Uridine	-2.38223	-10.6918
517-28-2 Hematoxylin	-26.9282	-9.40955
989-51-5 (-)-Epigallocatechin Gallate	-0.72	-1.73649
93-35-6 7-Hydroxycoumarin	1.85727	-9.35961
123-99-9 Azelaic acid	4.42332	8.24814
1400-61-9 Nystatin (Fungicidin)	4.33375	4.56055
101-31-5 L-Hyoscyamine	28.4099	-10.7722
481-72-1 Aloe-emodin	40.983	10.3935
53-84-9 Cozymasei(NAD+)	-1.93831	-16.8284
573-20-6 Menadiol Diacetate	10.7133	7.5046
92-61-5 Scopoletin	8.38454	13.1587
55-48-1 Atropine sulfate	5.3468	-4.13459
83-88-5 Riboflavin	11.5014	-16.4506
12650-69-0 Mupirocin	-7.27147	-21.3617
9012-76-4 Chitosan	21.8621	-7.74421
29883-15-6 Laetrile	3.18873	-10.9617
50-23-7 Hydrocortisone	9.42199	-5.36261
69558-55-0 Thymopentin	-2.25368	-13.3127
535-83-1 Trigonelline	12.8906	9.97556
58-18-4 17-Methyltestosterone	17.6262	6.21191
51-48-9 L-Thyroxine	28.5219	-8.74728
53123-88-9 Rapamycin (Sirolimus)	60.3942	21.8813
890-38-0 2'-Deoxyinosine	-2.55738	21.5614
104987-11-3 Tacrolimus (FK506)	-5.93292	-8.97121
131-48-6 N-Acetylneuraminic acid	-5.34939	-0.261106
14605-22-2 Tauroursodeoxycholic Acid	-4.3981	-5.03946
6024-85-7 Tetrahydropalmatine hydrochloride	11.7982	2.61867
117-39-5 Quercetin	-42.0355	-5.0534
1393-48-2 Thiostrepton	5.5002	-4.65159
68-96-2 Hydroxyprogesterone	10.6142	-12.8259
58-64-0 ADP	25.8792	-3.3764
700-06-1 Indole-3-carbinol	3.58909	-4.14707
7235-40-7 Beta-Carotene	-16.2718	-6.43916
480-18-2 Taxifolin (Dihydroquercetin)	-19.1684	-7.27324
11021-14-0 Ginsenoside Rc	1.82743	-1.92197
63968-64-9 Artemisinin	-36.5607	-20.698
298-81-7 8-Methoxypsoralen	2.14045	-5.1513
501-36-0 Resveratrol	39.3631	15.2052
61-19-8 Adenosine 5'-monophosphate	-0.508803	-5.84184
480-40-0 Chrysin	1.13685	-13.7228
62-31-7 Dopamine hydrochloride	-24.8447	5.06655
19879-30-2 Bavachinin	16.2287	6.88642
860-79-7 Cyclovirobuxin D	1.23023	10.199
50-81-7 L(+)-Ascorbic acid	10.667	2.06377
56038-13-2 Sucralose	8.35653	-13.1492
86639-52-3 SN-38	86.1986	72.9026
56-85-9 L-Glutamine	3.86033	-13.2206
149-64-4 Scopolamine butylbromide	5.88294	-14.3578
6893-02-3 Lyothyronine	-1.85645	-5.39297
520-18-3 Kaempferol	-31.6105	-3.8235
960383-96-4 Jatrorrhizine hydrochloride	-19.6137	-3.94219
80-92-2 5Beta-Pregnane-3Alpha,20alpha-Diol	35.9857	41.374
2216-51-5 L-Menthol	2.33627	-5.30445
126-07-8 Griseofulvin	72.8542	55.9576
525-79-1 Kinetin	2.22016	-1.34741
31430-18-9 Nocodazole	84.8239	45.8541
317-34-0 Aminophylline	0.51975	-8.63993
11032-49-8 Menatetrenone	10.3263	3.04236
20831-76-9 Gentiopicrin	8.87094	6.41161
71751-41-2 Abamectin	69.3529	-4.45162
117772-70-0 Azithromycin dihydrate	4.70468	-45.904
57-63-6 Ethynyl estradiol	77.5869	15.7554
446-72-0 Genistein	15.8705	-49.2352
50-27-1 Estriol	3.80755	-47.292
73-31-4 Melatonine	2.34431	-47.0334
6078-17-7 Berbamine dihydrochloride	43.2898	-39.5509
574-84-5 Fraxetin	-6.3419	-43.4063
82-02-0 Khellin	3.6505	12.4524
16485-10-2 Panthenol	7.73174	-13.9705
59865-13-3 Cyclosporin A	48.5474	18.4366
520-36-5 Apigenin	20.881	-8.31536
68-41-7 D-Cycloserine	6.66885	-3.36473
22888-70-6 Silibinin	7.50133	-2.63305
84687-43-4 Astragaloside IV	8.39791	5.58181
54-11-5 Nicotine	1.42044	10.0795
80418-24-2 Notoginsenoside R1	1.525	7.54906
553-21-9 Costunolide	11.8866	9.67006
66-97-7 Psoralen	0.767172	-9.65326
7770-78-7 Arctigenin	44.6007	7.8823
114-49-8 Scopolamine HBr	-1.09257	-17.2271
34157-83-0 Celastrol	0.500033	-14.4715
315-22-0 Monocrotaline	2.96965	-14.317
20736-09-8 Saikosaponin A	9.43399	-0.0149211
523-50-2 Isopsoralen	9.38902	4.10143
482-45-1 Isoimperatorin	8.54685	14.363
480-19-3 Isorhamnetin	16.8846	1.44583
327-97-9 Chlorogenic Acid	6.9963	-4.04782
478-01-3 Nobiletin	18.2267	1.79358
102518-79-6 (-)-Huperzine A (HupA)	-0.715793	-5.90983
17306-46-6 Rhoifolin	-4.74728	-0.347825
27409-30-9 Picroside I	-3.55751	10.8001
19666-76-3 Panaxadiol	1.46663	8.09056
54952-43-1 Shikonin	91.1276	41.0247
5289-74-7 Ecdysterone	5.47921	-10.4653
490-46-0 Epicatechin	-6.73156	-22.5251
30636-90-9 (20S)-Protopanaxadiol	-3.51835	-11.4947
6902-91-6 Germacrone	-1.61164	5.44397
6902-77-8 Genipin	4.38798	-1.46983
1124-11-4 Tetramethylpyrazine	0.655447	-2.35623
486-35-1 Daphnetin	-9.81473	-0.387097
482-36-0 Hyperoside	-1.39884	-0.488234
303-98-0 Coenzyme Q10 (CoQ10)	12.1038	5.50728
529-59-9 Genistin	33.8407	-10.7161
66575-29-9 Forskolin	-22.8597	6.69625
78214-33-2 Ginsenoside Rh2	-6.85744	21.1128
343-27-1 Harmine hydrochloride	58.1661	37.2225
52286-74-5 Ginsenoside Rg2	-2.1088	-0.0737874
61281-38-7 Schizandrin A	12.1602	-1.5261
61281-37-6 Schizandrin B	3.75897	0.141029
1257-08-5 (-)-Epicatechin gallate	3.41771	-5.38557
2415-24-9 Catalpol	-29.4181	-4.78715
485-49-4 (+)-Bicuculline	4.32548	5.61875
545-47-1 Lupeol	-8.23245	6.16495
58546-56-8 Schisantherin A	-2.43667	7.21643
522-97-4 Tetrahydroberberine THB	0.484421	2.64256
32791-84-7 Panaxtriol	1.18925	-4.40323
480-16-0 Morin	5.81074	-7.29019
20362-31-6 Arctiin	40.255	-9.81702
83-48-7 Stigmasterol	3.21699	-7.75561
16830-15-2 Asiaticoside	-7.40459	6.06969
53956-04-0 Monoammonium glycyrrhizinate	18.3369	3.66514
551-15-5 Liquiritin	-5.19724	-1.87106
83-46-5 Beta-Sitosterol	-6.39824	2.03868
22427-39-0 Ginsenoside Rg1	-0.713432	-8.83941
41753-43-9 Ginsenoside Rb1	2.68201	-8.15916
489-32-7 Icariin	11.0254	-1.06049
7432-28-2 Schisandrin	6.19164	8.5985
70288-86-7 Ivermectin	91.54	52.6494
4449-51-8 Cyclopamine	9.26097	14.1207
102040-03-9 Tubeimoside I	78.2015	56.223
88901-36-4 Mogroside V	-3.98856	17.3681
632-85-9 Wogonin	59.861	11.8873
12542-36-8 Gossypol acetic acid	93.4227	71.5447
20283-92-5 Rosmarinic acid	84.1123	63.426
4871-97-0 Curcumol	1.66622	-1.04096
38183-03-8 7,8-Dihydroxyflavone	-3.13305	9.28906
94987-08-3 Gypenoside XLIX	-6.05831	14.9209
29031-19-4 Glucosamine sulfate	91.6455	67.168
38748-32-2 Triptolide (PG490)	83.1652	87.319
546-43-0 Helenine	9.56116	29.1972
552-66-9 Daidzin	14.2141	2.15959
134418-28-3 Dehydroandrographolide	18.7643	-2.26288
128-57-4 Sennoside B	32.9418	13.4282
481-42-5 Plumbagin	6.26426	-5.52325
40246-10-4 Glycitin	-3.59014	8.44562
522-12-3 Quercitrin	-2.71741	6.32076
510-30-5 Echinocystic acid	7.25992	15.0099
57817-89-7 Stevioside	2.8279	-7.0706
52286-59-6 Ginsenoside Re	6.23489	1.40257
5986-55-0 Patchouli alcohol	4.12546	-3.95676
970-74-1 Epigallocatechin	3.30619	8.863
507-70-0 Borneol	0.480292	7.9577
42553-65-1 Crocin	-15.6525	14.8807
13114-29-9 Sodium Demethylcantharidate	-4.95493	32.731
42719-32-4 Pedunculoside	1.04988	22.2888
473-98-3 Betulin	-2.29234	13.3129
487-03-6 Harmol	55.692	26.6485
21082-33-7 Orcinol glucoside	23.5419	8.13406
34080-08-5 Protopanaxatriol	14.7826	-0.144307
33570-04-6 Bilobalide	19.9029	4.87173
20350-15-6 Brefeldin A	89.9509	85.5884
498-02-2 Acetovanillone	16.7014	6.03158
150-86-7 PHYTOL	14.4596	10.1757
436-77-1 (+)-Fangchinoline	91.699	78.1412
521-12-0 Drostanolone Propionate	38.1554	9.2372
63223-86-9 Ginsenoside Rh1	22.8256	2.56233
15291-77-7 Ginkgolide B	13.2217	-3.86996
1953-04-4 Galanthamine HBr	19.8581	-4.80829
28649-59-4 Euphorbiasteroid	30.8643	11.9292
152-95-4 Sophoricoside	4.15828	4.77154
28351-05-5 Triacontanol	7.85525	10.3971
97682-44-5 Irinotecan	7.14149	13.9976
65666-07-1 Silymarin	52.0921	21.1916
39524-08-8 Asperosaponin Ⅵ	25.6529	-4.50828
481-53-8 Tangeretin	32.5159	18.6219
31282-04-9 Hygromycin B	24.6419	18.9576
486-84-0 Harmane	20.0739	10.8765
11041-94-4 Higenamine Hydrochloride	7.81949	4.38293
38899-05-7 N-Sulfo-glucosamine sodium salt	6.01081	9.59871
51-67-2 Tyramine	79.0844	62.7446
6147-11-1 Mangostin	26.4498	6.20218
15291-75-5 Ginkgolide A	29.4026	-5.8448
487-41-2 Forsythin	25.319	-0.169487
61036-62-2 Teicoplanin	16.1939	3.92751
489-84-9 Guaiazulene	1.176	-0.321855
13190-97-1 Solanesol	9.11497	9.11222
116122-36-2 Breviscapin	14.0442	8.25419
13422-55-4 Methylcobalamin	8.43604	11.551
465-21-4 Bufalin	85.5787	75.2141
17388-39-5 Swertiamarin	20.8783	4.67492
71-58-9 Farlutin	27.3867	20.3318
442-51-3 Harmine	58.3159	39.2926
519-23-3 Ellipticine	73.7513	53.8231
22681-72-7 Danshensu	10.7602	9.82444
106-22-9 Citronellol	15.3913	15.2964
6429-04-5 Tetrahydropapaverine hydrochloride	12.5704	12.708
553-12-8 Protoporphyrin IX	21.7589	3.08606
69659-80-9 Tanshinone IIA-sulfonic sodium	25.5497	0.863313
24280-93-1 Mycophenolic acid	80.4861	47.1923
70674-90-7 Catharanthine sulfate	27.2999	24.8684
5392-40-5 Citral	4.40374	5.44565
56293-29-9 Aloperine	8.96653	3.41569
14113-05-4 10-Hydroxy-2-decenoic acid	16.3069	5.05598
472-61-7 Astaxanthin	1.95346	23.0487
51-45-6 Histamine	24.9911	-1.21319
107668-79-1 Bulleyaconi cine A	15.1745	-3.84032
33069-62-4 Paclitaxel	83.4689	71.6724
18883-66-4 Streptozocin	8.36889	8.93368
58543-16-1 Rebaudioside A	6.75053	5.33996
1405-37-4 Capastat sulfate	9.31898	10.237
2244-16-8 (S)-(+)-Carvone	16.8212	16.0658
6138-23-4 D-(+)-Trehalose dihydrate	9.26449	10.2598
94-07-5 Synephrine	16.0345	11.3798
15291-76-6 Ginkgolide C	22.1293	5.69281
477-43-0 Dehydrocostus Lactone	61.591	33.7685
104987-12-4 Ascomycin (FK520)	83.9528	52.9362
8002-43-5 L-α-Phosphatidylcholine	6.61697	9.50922
107-43-7 Betaine	12.9168	5.94798
4136-37-2 Stachydrine Hydrochloride	17.8306	19.6373
1424-00-6 Mesterolone	13.3017	13.1097
1617-90-9 Vincamine	20.6178	8.8333
71610-00-9 Cephalomannine	83.8301	61.4702
34540-22-2 Madecassoside	9.11743	-0.140637
166518-60-1 Avasimibe	45.7537	-14.8378
8006-54-0 Lanolin	1.62931	-3.34955
4429-63-4 Tabersonine	29.2673	9.28671
471-66-9 ALPHA-BOSWELLIC ACID	17.0091	5.5959
514-10-3 Abietic Acid	7.2394	9.07319
32981-86-5 10-Deacetylbaccatin III	72.1923	28.1399
28957-04-2 Rubescensin A	66.3093	26.4954
19408-46-9 Kasugamycin hydrochloride	17.5929	5.37499
82508-31-4 Pseudolaric Acid B	82.8272	40.8459
17092-92-1 Dihydroactinidiolide	2.02901	-5.79106
64439-81-2 Hydroxy Camptothecine	89.9466	85.4021
5989-27-5 (R)-(+)-Limonene	11.9818	18.2339
8000-46-2 Geranium oil	-15.8981	7.62262
476-28-8 Lycorine	77.2884	69.8132
117048-59-6 Combretastatin A4	87.1116	33.9921
5373-11-5 Cynaroside	29.6602	-10.4166
6754-58-1 Xanthohumol	43.8771	13.4659
79916-77-1 Forsythoside A	20.1368	-13.2527
14197-60-5 Ginsenoside Rg3	19.7923	-0.409525
27208-80-6 Polydatin	18.2332	5.17332
8001-79-4 Castor oil	-5.07408	9.03652
565-63-9 Angelic Acid	5.30941	-6.11361
136849-88-2 Macranthoidin B	7.79292	-5.06407
60-70-8 Veratramine	46.8551	18.4749
68399-76-8 OROTIC ACID ZINC SALT DIHYDRATE	21.2569	2.24232
470-37-1 Cinobufagin	88.8762	75.1847
152743-19-6 Lysionotin	61.3969	3.56723
3895-92-9 Chelerythrine chloride	92.5483	35.2933
84929-27-1 Grape Seed Extract	68.5746	69.916
578-86-9 Liquiritigenin	-33.674	-3.52705
14216-03-6 Hederacoside C	8.80241	1.295
61276-17-3 Verbascoside	5.14285	-1.40751
80321-69-3 Gypenoside XVII	17.6771	-5.85041
10597-60-1 3,4-Dihydroxyphenylethanol	-10.6923	-7.04359
1617-53-4 Amentoflavone	20.1307	-12.4222
41059-79-4 Timosaponin AIII	93.2256	87.5782
922-32-7 Creatine phosphate disodium salt	-3.73995	7.45931
6246-46-4 Ursonic Acid	44.3191	5.62315
22368-21-4 Eupatilin	22.5811	0.386522
631-01-6 Quillaic Acid	11.8216	-3.50042
96990-18-0 Momordin Ic	12.1622	3.2636
107316-88-1 Demethylzeylasteral	13.0961	-6.65058
1847-58-1 Sodium houttuyfonate	21.6983	8.85912
4547-24-4 Corosolic acid	21.8247	14.9581
121-33-5 Vanillin	-4.6484	8.8931
6882-68-4 Sophoridine	0.372691	3.96585
24316-19-6 Cephalotaxine	7.74078	-2.63547
63550-99-2 Dulcoside B	0.311408	-5.50225
1392-21-8 Kitasamycin	-41.4075	-15.9565
11042-64-1 Gamma-Oryzanol	9.42323	-7.49026
18642-23-4 Psoralidin	20.6658	3.47106
479-98-1 Aucubin	23.0154	5.8417
536-59-4 Perillyl alcohol	2.51609	9.19268
75887-54-6 Arteether	30.4892	0.696463
27013-91-8 Alpha-Hederin	22.147	40.3007
87205-99-0 Dihydrotanshinone I	93.571	83.2753
37921-38-3 Cimifugin	12.3447	-10.6802
110642-44-9 Epimedin C	40.08	15.9673
19608-29-8 17 alpha-propionate	18.7604	0.960741
482-38-2 Kaempferitrin	26.4197	11.0098
17990-42-0 Oleanonic Acid	37.8939	8.70944
19057-60-4 Dioscin	93.3626	92.5713
39432-56-9 Eleutheroside E	-1.03982	-13.994
108321-42-2 Geneticin (G418 Sulfate)	7.08288	-8.13966
58749-22-7 Licochalcone A	9.60346	-18.2547
113558-15-9 Baohuoside I	46.0649	9.39737
20633-67-4 Calycosin-7-O-beta-D-glucoside	3.27453	-6.95073
524-12-9 Wedelolactone	51.7235	32.8618
1157-39-7 4',7-Dimethoxyisoflavone	12.9542	17.8565
51059-44-0 Wogonoside	7.60447	0.917285
469-59-0 Jervine	14.9723	-4.82701
27975-19-5 Isosteviol	0.97239	-6.16363
59870-68-7 Glabridin	2.60449	-1.68204
118-34-3 Syringin	5.06039	-3.80303
23513-14-6 6-Gingerol	24.1963	-1.70203
53963-43-2 Ginsenoside F1	20.1878	5.53471
20554-84-1 Parthenolide	3.65606	10.4369
529-53-3 Scutellarein	7.40873	-10.4937
475-83-2 Nuciferine	7.81837	2.00262
42079-78-7 5-methoxyflavone	10.1779	8.81313
611-40-5 Tectoridin	20.6699	-3.87389
118525-40-9 Icaritin	50.8208	-0.11998
25406-64-8 Morroniside	13.7854	-7.72716
6199-67-3 Cucurbitacin B	89.8905	82.4889
22255-22-7 3,5,4'-Trimethoxystilbene	9.42474	12.5528
84605-18-5 Cycloastragenol	1.2146	15.6698
5058-13-9 Columbianadin	-7.97061	0.169708
487-11-6 Elemicin	-0.370928	-0.563745
751-03-1 Obacunone	-7.62985	2.41397
130-86-9 Protopine	20.1185	8.18702
26833-87-4 Homoharringtonine	93.6668	89.4834
72-63-9 Methandrostenolone	2.28017	21.4673
74285-86-2 Triptophenolide	5.44461	10.061
19130-96-2 1-Deoxynojirimycin	6.40277	-1.22339
78281-02-4 Hydroxysafflor yellow A	11.1003	-0.441415
6812-81-3 Roburic acid	23.7604	20.2871
69884-00-0 Pseudoginsenoside F11	22.0589	4.95167
531-44-2 scopolin	18.0345	4.22484
2469-34-3 Senegenin	19.55	0.278728
20874-52-6 Saikosaponin D	91.821	91.8591
7431-77-8 Sinapine thiocyanate	-0.334248	-7.67201
19431-84-6 Curcumenol	3.71336	-0.14674
162857-78-5 polygalaxanthone III	13.0343	-2.7543
99-76-3 Methyl 4-hydroxybenzoate	16.4193	-6.7585
64809-67-2 Neomangiferin	16.3842	-6.6563
4233-96-9 (-)-Gallocatechin gallate	10.7587	1.47552
104472-68-6 Typhaneoside	16.9193	2.9708
19083-00-2 Gracillin	93.2692	92.3909
80154-34-3 Helicid	5.17605	-2.17376
218600-44-3 CDDO(Bardoxolone)	92.4322	85.5172
2883-98-9 alpha-Asarone	8.98538	-0.0230431
134-96-3 syringaldehyde	13.5597	-12.2863
62025-49-4 Ginsenoside F2	12.608	-13.2365
28831-65-4 lithospermic acid	7.44087	-9.46382
99-24-1 Methyl gallate	5.49867	5.64462
4373-41-5 Maslinic acid	24.005	4.44781
84272-85-5 5-O-Methylvisammioside	-3.2818	5.37359
500-44-7 L-Mimosine	9.62379	-3.86339
2752-65-0 Gambogic Acid	7.36943	-5.65318
84680-75-1 Astragaloside I	10.7765	-11.4427
3621-38-3 Jatrorrhizine	-19.1771	-22.2659
61303-13-7 Isoacteoside	6.00093	-8.63934
84954-92-7 ROSAVIN	-1.22165	0.706839
65497-07-6 Esculentoside A	19.3487	3.71576
145435-72-9 Gamithromycin	1.21884	2.08808
533-31-3 Sesamol	10.596	5.24826
550-24-3 Embelin	10.5918	9.33196
30387-39-4 Colistimethate Sodium	0.216707	10.9629
36062-04-1 Tetrahydro Curcumin	16.4765	-2.35129
884-35-5 Methyl syringate	11.6746	1.92921
260413-62-5 Ligustroflavone	5.92088	-1.57782
20183-47-5 Tenuifolin	16.8214	8.94082
76958-99-1 Dehydroandrographolide Succinate Potasium Salt	12.7943	9.48263
548-83-4 Galangin	12.4766	10.2296
139891-98-8 3,6'-Disinapoyl sucrose	5.13947	-0.164559
50773-41-6 POLYPHYLLIN D	93.2744	91.2904
19879-32-4 Bavachin	2.65466	14.3421
481-06-1 α-santonin	-1.92365	-3.12386
623-05-2 4-Hydroxybenzyl alcohol	5.04562	-7.35486
524-30-1 Fraxin	13.1152	5.93466
477-47-4 Picropodophyllin (PPP)	89.052	50.721
55290-63-6 Atractylodin	-6.71085	7.82135
499-44-5 β-thujaplicin	59.6306	29.8358
495-31-8 Nodakenin	7.78249	0.757218
33464-71-0 tracheloside	27.3092	0.373935
530-59-6 Sinapinic Acid	4.09909	-5.48789
93-07-2 Veratric acid	4.90993	-0.589434
27215-14-1 Neoandrographolide	4.63397	2.70144
122-48-5 Vanillylacetone	13.0317	8.43036
55481-88-4 Mollugin	-6.18021	26.888
20784-50-3 Isobacachalcone	-13.7583	6.16392
107534-93-0 Anwuligan	6.4007	-3.46225
54522-52-0 Methyl protodioscin	93.3328	92.314
72581-71-6 Isosilybin	13.2506	-0.256753
80681-45-4 CIMIFUGIN BETA-D-GLUCOPYRANOSIDE	2.46721	-2.02025
831-61-8 Ethyl gallate	5.60122	9.652
13657-68-6 Curdione	3.18337	13.8969
6151-25-3 Quercetin Dihydrate	-32.1962	7.97873
23094-69-1 Corilagin	9.50105	3.7681
129724-84-1 Anemoside A3	-3.63155	9.66107
55750-84-0 Crocin II	-18.7453	-3.83776
89412-79-3 Raddeanin(Anemodeanin) A	93.536	91.7197
31008-18-1 magnolin	13.7857	3.71464
474-58-8 Eleutheroside A	15.321	14.4485
148244-82-0 Secoisolariciresinol diglucoside	-0.368739	4.98798
64820-99-1 Vitexin-2''-O-rhamnoside	-1.18319	8.2939
89-84-9 2,4-Dihydroxyacetophenone	4.36579	8.14452
58316-41-9 Saikosaponin B2	3.74558	10.0134
39262-14-1 (20S)-20-(β-D-Glucopyranosyloxy)dammara-24-ene-3β,12β-diol	1.97199	6.39514
776-86-3 6-HYDROXY-7-METHOXYCOUMARIN	8.24891	0.236681
146501-37-3 Complanatoside A	-37.651	2.66865
5631-68-5 Hydroumbellic acid	12.3131	7.02381
61371-55-9 griffonilide	2.47237	-18.0734
115909-22-3 Angoroside C	3.57999	-6.3452
73030-71-4 Atractylenolide III	-0.760659	-9.31552
10284-63-6 D-Pinitol	9.81658	-13.1521
63492-69-3 Griffonin	11.4868	-21.8517
548-37-8 VERBENALIN	5.60318	-8.14558
50-07-7 Mitomycin C	91.6707	83.5751
35286-58-9 3-O-alpha-L-Arabinopyranosylpomolic acid beta-D-glucopyranosyl ester	11.7386	-17.2766
38243-03-7 20(R)-Propanaxadiol	12.2704	-20.515
17086-76-9 Cyasterone	10.782	-11.644
14144-06-0 Diosgenin glucoside	49.3193	30.3253
19367-38-5 Methyl 4-hydroxycinnamate	-64.4336	5.23252
56725-99-6 Icariside I	38.6109	-2.40207
11021-13-9 Ginsenoside Rb2	8.79882	-23.2856
500-66-3 Olivetol	-2.67222	-12.6744
110623-72-8 Epimedin A	8.93287	0.484298
68406-26-8 Ginsenoside Rb3	12.8478	-1.50526
42438-89-1 Pinostilbene	0.270836	13.6403
51938-32-0 APIGENIN-6-GLUCOSIDE-8-ARABINOSIDE	9.6668	-13.3317
64421-28-9 SHANZHISIDE METHYL ESTER	9.41581	-21.0044
39011-92-2 Nuezhenide	3.38124	3.46443
80952-71-2 (20R)-Ginsenoside Rh1	11.9697	-7.86324
32619-42-4 Oleuropein	7.62533	-10.0365
13159-28-9 Betulinaldehyde	3.86377	15.3783
84104-71-2 Wilforlide A	4.21848	-21.2299
55466-04-1 Jujuboside A	2.72053	0.2621
117060-54-5 Pueraria glycoside	9.23565	-10.98
81525-13-5 Forsythoside B	5.0775	-14.7786
95041-90-0 Erianin	87.99	25.5929
112246-15-8 Ginsenoside Rh2	16.2463	-25.8968
32507-66-7 Isorhapontigenin	52.7554	11.3959
55466-05-2 Jujuboside B	14.7846	-0.390207
36052-37-6 Alpinetin	29.6417	-7.33714
488-44-8 Allitol	4.92271	-13.3233
1867-73-8 N6-methyladenosine (m6A)	19.4228	-18.6583
140360-29-8 macranthoidin A	5.33692	14.5032
84676-89-1 Astragaloside II	33.6424	29.8101
548-77-6 Tectorigenin	22.1428	0.633581
55033-90-4 ISORHAMNETIN 3-O-NEOHESPEROSIDE	2.46494	-5.29369
19408-84-5 Dihydrocapsaicin	17.4151	-2.70294
20736-08-7 Saikosaponin C	-0.000153189	4.56742
882664-74-6 Polygalasaponin F	8.70334	-4.90299
58479-68-8 Platycodin D	39.056	9.11378
23513-15-7 10-Gingerol	22.361	-11.9374
303-45-7 Gossypol	4.98265	-23.22
491-54-3 kaempferide	7.67336	18.9348
114482-86-9 Oroxin B	8.88509	2.14034
34367-04-9 GinsenosideRo	6.81852	-5.95183
129741-57-7 Anemoside B4	11.5864	-22.3472
80433-71-2 Calcium Levofolinate	5.93319	-18.3771
