# Supplementary material for: A traditional gynecological medicine inhibits ovarian cancer progression and eliminates cancer stem cells via the LRPPRC–OXPHOS axis
Source: J Transl Med. 2023 Jul 26;21:504. doi: 10.1186/s12967-023-04349-3 (PMC10373366; doi:10.1186/s12967-023-04349-3)
Supplement: Supplementary file 3 — Additional file 3. Data 2. Primer sequence. [file 12967_2023_4349_MOESM3_ESM.xlsx]

## Sheet: Sheet1
Primier	Sequence （5'-3'）
ND1-Forward	GAACACCTCTGATTACTC
ND1-Reverse	GTATTCGGCTATGAAGAA
ND2-Forward	TCT CAA TCT TAT CCA TCA TAG C
ND2-Reverse	GAA TGC GGT AGT AGT TAG G
ND4-Forward	TAT CGC TCA CAC CTC ATA
ND4-Reverse	ATG GCA ATA GGC ACA ATA
COX I-Forward	CAGTCTACCCTCCCTTAGCA
COX I-Reverse	TGATGGCCCCTAAGATAGAG
COX II-Forward	GACTCCTTGACGTTGACAAT
COX II-Reverse	GGTGAAAGTGGTTTGGTTTA
COX III-Forward	CTCACTATCTGCTTCATC
COX III-Reverse	AAGACCCTCATCAATAGA
ATP6-Forward	ACA CTA AAG GAC GAA CCT GA
ATP6-Reverse	GGT GGT TGG TGT AAA TGA GT
ATP8-Forward	CCATACTCCTTACACTATTCC
ATP8-Reverse	ATGAATGAAGCGAACAGAT
Cytb-Forward	CTTACTTCTCTTCCTTCTC
Cytb-Reverse	AATTGTGTAGGCGAATAG
LRPPRC-Forward	ACCCCAATACTTCGGCTTGG
LRPPRC-Reverse	AAATCGGGGTTTGTTCAGCA
RPLPO-Forward	GTTGCTGGCCAATAAGGTGC
RPLPO-Reverse	CAGCTGCACATCACTCAGGA
